# Supplementary material for: Differential Functional Roles of ALDH1A1 and ALDH1A3 in Mediating Metastatic Behavior and Therapy Resistance of Human Breast Cancer Cells
Source: PubMed Central journal article supplement (PMC5666721; doi:10.3390/ijms18102039), 2017-09-22
Supplement: ijms-18-02039-s001.pdf [file ijms-18-02039-s001.pdf]

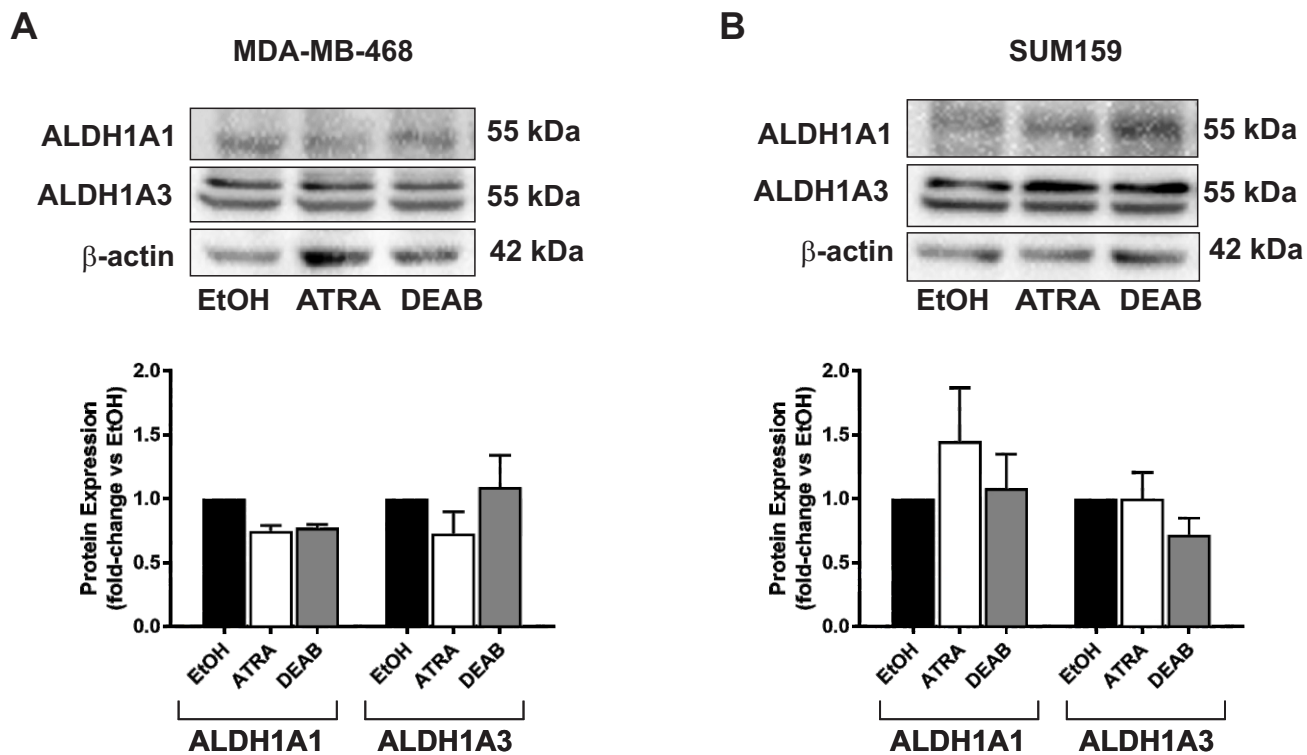

**Supplemental Figure S1:** Treatment with ATRA or DEAB does not alter protein expression of ALDH1A1 or ALDH1A3 isozymes. (A) MDA-MB-468 and (B) SUM159 human breast cancer cells were treated in culture for 48 hours with 5 $\mu$ M ATRA, 100 $\mu$ M DEAB or EtOH as a vehicle control. Cell lysates were collected and subjected to immunoblotting to assess ALDH1A1 and ALDH1A3 protein expression. Top panels show representative immunoblots. Bottom plots show quantitative densitometric analysis (n=3 blots). In all cases, data represents the mean  $\pm$  SEM normalized to vehicle control.

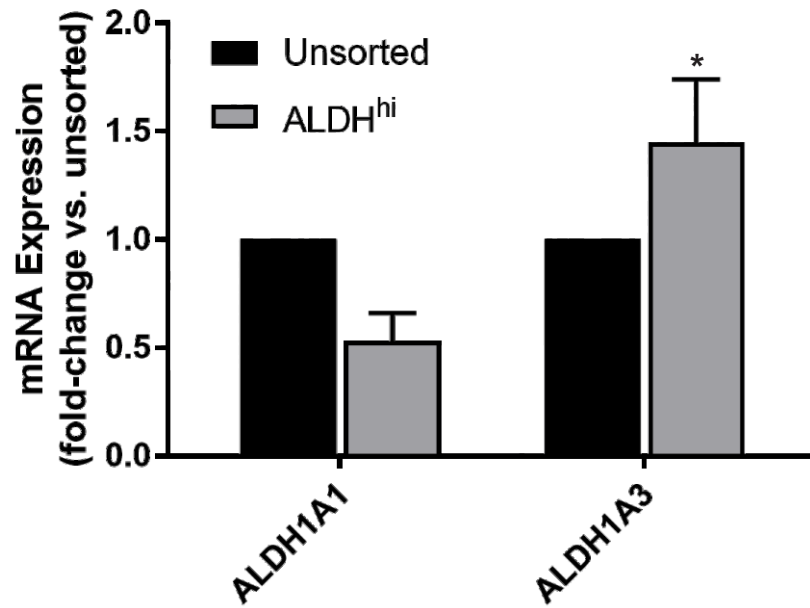

**Supplemental Figure S2:** ALDH1A3 mRNA expression is higher than ALDH1A1 mRNA expression in sorted ALDH<sup>hi</sup> breast cancer cell populations. MDA-MB-468 breast cancer cells were subjected to FACS using the Aldefluor® assay as described in the Materials and Methods. Unsorted and sorted ALDH<sup>hi</sup> cell populations were subjected to qRT-PCR to assess ALDH1A1 and ALDH1A3 expression (n=3). Data represents the mean +/- SEM. \* = significantly different than ALDH1A1 (p<0.05).
